# Supplementary material
Source: PubMed Central journal article supplement (PMC4135728)
Supplement: EC.00302-13_zek999094246so1.pdf [file EC.00302-13_zek999094246so1.pdf]

## SUPPLEMENTAL TABLE

Table S1. PCR primers

| Primer | Use                                 | Sequence (5' → 3')                                |
|--------|-------------------------------------|---------------------------------------------------|
| JC17   | <i>SATI</i> flipper                 | GGCCCCCCTCGAGGAAGTT                               |
| JC18   | <i>SATI</i> flipper                 | GCTCTAGAAGTAGTGGATCT                              |
| JC182  | 5'NCR of <i>CNBI</i>                | TGCATCATTCGAAGACATGG                              |
| JC183  | 5'NCR of <i>CNBI</i>                | <u>AACTTCCTCGAGGGGGGGCC</u> GATATCGTTACGAGTG      |
| JC184  | 3'NCR of <i>CNBI</i>                | <u>AGATCCACTAGTTCTAGAGCC</u> GATTGTTTACTTGTTTCATG |
| JC185  | 3'NCR of <i>CNBI</i>                | CGTGAGTTGATACATAACCA                              |
| JC186  | <i>CNBI</i> overlap                 | TGGGAAACCAGCATTGTTGT                              |
| JC187  | <i>CNBI</i> overlap                 | TCGGAAGAAGTGTTGTGACA                              |
| JC188  | <i>CNBI</i> ORF                     | ATGGGGGCCAATTCAAGTAT                              |
| JC189  | <i>CNBI</i> ORF                     | CGTCAATGTGTTTGCAATGG                              |
| JC48   | Disruption confirmation             | ACAATCAAAGGTGGTCCT                                |
| JC81   | Disruption confirmation             | AACTTCCTCGAGGGGGGGCC                              |
| JC400  | 3' NCR of 2nd allele of <i>CNBI</i> | <u>AGATCCACTAGTTCTAGAGCC</u> CATTGCAAACACATTGACG  |
| JC402  | 5' NCR of 2nd allele of <i>CNBI</i> | <u>AACTTCCTCGAGGGGGGGCC</u> GATGATTTCTTCAATACT    |
| JC215  | 5'NCR of <i>CRZI</i>                | AGTATAATTCAACTGACTTCA                             |
| JC216  | 5'NCR of <i>CRZI</i>                | <u>AACTTCCTCGAGGGGGGGCC</u> GAAAATTGACTAAACGGG    |
| JC217  | 3'NCR of <i>CRZI</i>                | <u>AGATCCACTAGTTCTAGAGC</u> ATTCAATTTCTATGTGTTTGT |
| JC218  | 3'NCR of <i>CRZI</i>                | GGAAATATCATTAATTGATGC                             |
| JC219  | <i>CRZI</i> overlap                 | CACATGATCTGAAATATCTGA                             |
| JC220  | <i>CRZI</i> overlap                 | CCTTTTCAGCAGATGTTAGTG                             |
| JC221  | <i>CRZI</i> ORF                     | TAATATCCGTCAGGATGAGGA                             |
| JC222  | <i>CRZI</i> ORF                     | ACATCGGAATATGCAGTTGG                              |
| JC405  | 5' NCR of 2nd allele of <i>CRZI</i> | <u>AACTTCCTCGAGGGGGGGCC</u> TCCTCATCCTGACGGATATT  |
| JC406  | 3' NCR of 2nd allele of <i>CRZI</i> | <u>AGATCCACTAGTTCTAGAGC</u> TCAATTGCTAACCTCATCC   |

Sequences complementary to the *SATI* flipper are underlined.

## SUPPLEMENTAL FIGURE LEGENDS

**Figure S1. Amino acid identity and pairwise alignment of calcineurin regulatory subunit (Cnb1) from *C. tropicalis*, *C. albicans*, and *S. cerevisiae*.** Amino acid identity and multiple sequence alignments are depicted using ClustalW software ([http://npsa-pbil.ibcp.fr/cgi-bin/npsa\\_automat.pl?page=npsa\\_clustalw.html](http://npsa-pbil.ibcp.fr/cgi-bin/npsa_automat.pl?page=npsa_clustalw.html)). (A) The % identity shared between the full-length proteins is shown in red. (B) The conserved amino acids and four Ca<sup>2+</sup>-binding EF-hand motifs are indicated with green-shading and red-underlining, respectively. The ScCnb1 amino acids are numbered.

**Figure S2. Amino acid identity and pairwise alignment of calcineurin downstream target Crz1 from *C. tropicalis*, *C. albicans*, and *S. cerevisiae*.** (A) The % identity of the full-length proteins is shown in red. (B) The conserved amino acids and two zinc finger motifs (X<sub>2</sub>-Cys-X<sub>2,4</sub>-Cys-X<sub>12</sub>-His-X<sub>3,4,5</sub>-His; Cys<sub>2</sub>His<sub>2</sub> type) are indicated with green-shading and red-underlining, respectively.

**Figure S3. *C. tropicalis* is able to form hyphae on corn meal solid agar plate.** *C. tropicalis* MYA3404 and *C. albicans* SC5314 strains were grown on cornmeal solid plate for 7 days. Filamentous cells on the edge of the colonies were excised with a sterile scalpel. Excised filamentous cells were mixed with 100 µl of calcofluor white solution (1 mg/ml; Fluorescent Brighter 28) and incubated for 5 minutes at room temperature. The cell mixtures were washed three times with 1 ml of dH<sub>2</sub>O, and resuspended in 100 µl of dH<sub>2</sub>O. Stained cell suspensions were spotted onto a slide and visualized at 400X magnification under bright field and UV, then photographed. The arrows represent calcofluor white staining site between two cells. Scale bar = 25 µm.

**Figure S4. Mouse TLR4 is not required for protection from *C. tropicalis* in a murine systemic infection model.** The survival of C3H/HeJ (TLR4 -/-; group of 5) or C3H/HeOuJ (TLR4 +/+, group of 5) mice following intravenous challenge with 5 x 10<sup>6</sup> *C. tropicalis* wild-type MYA3404 yeast cells was monitored for 5 days. The p value calculated by the Log-rank (Mantel-Cox) test method between the two groups was 0.602.

**Figure S5. The loss of calcineurin or Crz1 does not affect cell growth at 37°C.** (A) The calcineurin and *crz1/crz1* mutants exhibited wild-type growth curves in YPD medium at 37°C. Cells were grown overnight at 30°C, washed twice with dH<sub>2</sub>O, diluted to 0.1 OD<sub>600</sub>/ml in fresh YPD medium, and incubated at 37°C with shaking at 200 rpm. The OD<sub>600</sub> of cultures was measured at 0, 3, 6, 9, 12, 24, 48, 72, and 96 hours. (B) The calcineurin and *crz1/crz1* mutants exhibited wild-type doubling times (~1.2 hr) in YPD medium at 37°C.

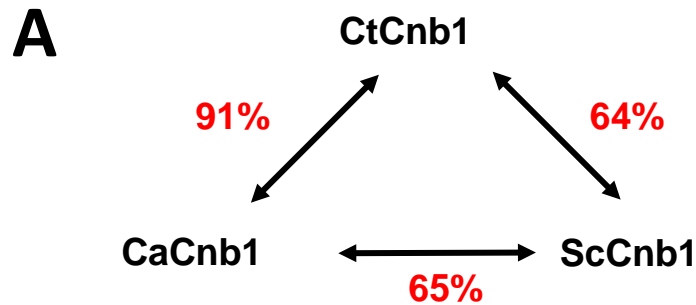

**B**

|        |                                                              |  |     |
|--------|--------------------------------------------------------------|--|-----|
|        | 1                                                            |  | 60  |
| CtCnb1 | MGAN-SSILNGFMEDTNFSIEEIHMRKRFMKLDKDGSGEIDKQEFLSIPGISSNPLATR  |  |     |
| CaCnb1 | MGAN-ASILDGFIEDTNFSIEEIDRLRKRFMKLDKDGSGQIDKQEFLSIPGISSNPLATR |  |     |
| ScCnb1 | MGAAPSKIVDGLEDTNFDRDEIERLRKRFMKLDKDRSGSIDKNEFMSIPGVSSNPLAGR  |  |     |
|        | 61                                                           |  | 120 |
| CtCnb1 | LMDVFDTDGDGRIDFEEFITGLSAFSGKSDNLTCLKFAFNIYDIDRDGYIGNGELFIVMK |  |     |
| CaCnb1 | LMDVFDKDGDSIDFEEFITGLSAFSGKSDNLNKLRFANFYDIDRDGYIGNGELFIVMK   |  |     |
| ScCnb1 | IMEVFDADNSGDVDFQEFITGLSIFSGRGSKDEKLRFAFKIYDIDKDFISNGELFIVLK  |  |     |
|        | 121                                                          |  | 175 |
| CtCnb1 | MMVGKNLQDEELQQIVDKTIMEADLDGDGKLNFEFQKAVNTDSIANTLTLNLF-       |  |     |
| CaCnb1 | MMVGKNLKDEELQQIVDKILMEADLDGDGKLNFEFQKAVNTDTIANTLTLNMF-       |  |     |
| ScCnb1 | IMVGSNLDDEQLQQIVDRITIVENDSDGDGRLSFEFQKAVNTTTEVAKSLTLQYDV     |  |     |

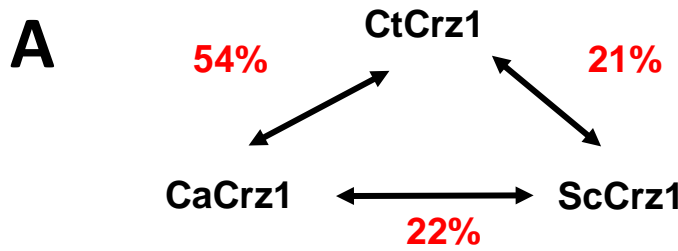

**B**

|        |                                                               |  |    |
|--------|---------------------------------------------------------------|--|----|
|        | 1                                                             |  | 60 |
| CtCrz1 | -----MSNNIRQDEDKQIYDVFNLSPPSITIK---EETTNSQSIDRTILSQPENSNQ     |  |    |
| CaCrz1 | -----MSNNPHQDDGSQLYDNFEISPPSIVIR---KADTDQSLNKIMLNQESQDIN      |  |    |
| ScCrz1 | MSFSNGNMASYMTSSNGEEQSINNKNIDIDNSAYRRNFRNSNSGSHTFQLSDLDLDVD    |  |    |
|        |                                                               |  |    |
| CtCrz1 | MHYEQ-----YNEAQALSFPSGSHQQPFLQQNQ-----EYSES-----FEP           |  |    |
| CaCrz1 | NYYTENVKNDNPNNSYQDYTFSGNSSNQHQHQHQHQHLYEDLPTQFHYSNNS---FFEP   |  |    |
| ScCrz1 | MRMDS-----ANSSEKISKNLSSGIPDSFDSNVNSLLSPSSG--SYSADLNYQSLYK     |  |    |
|        |                                                               |  |    |
| CtCrz1 | PPAPTVELITDPLPNFSPMPGGIYMTDNASDISLNTKDLPOFTTNDYLSFSSQVSNQFSP  |  |    |
| CaCrz1 | PPAPTVELITDPLPNFNYPSPNIYINDNASDISLNTKDLPOFTTNEFLSPTSQSLSTPFSP |  |    |
| ScCrz1 | FDLFOQQLQQQQLQQQQQQQQQQQQQKQTPTLKVEQSDTFQOWDDILTPADNQHRPSLT   |  |    |
|        |                                                               |  |    |
| CtCrz1 | GHYQQSSQDFLQVN----SNLNVNNSNSNLLNPRSPSQYSTHSLYSENSSQPASPYLDA   |  |    |
| CaCrz1 | GHYSQSSQDFLQVNHTNGSGNNSNNSNLLNPRSPSQYSSHSLYSDNSSQPASPFLDA     |  |    |
| ScCrz1 | NQFLSPRSNYDGTTRSS-GIDSNYSDTESNYHTPYLYPODLVSSPAMSHLTANDDFDLL   |  |    |
|        |                                                               |  |    |
| CtCrz1 | VSHVSNNS-FIPENIPTAYS DVGSNRGGVPGSNNLVPN-HFDTVNDFL--TAEIALGGS  |  |    |
| CaCrz1 | ASHVSNNS-FIPVVIPTALSDVGS-QNLDP SHNLGLSANQHFDVNEFLS-TGEIQLGQS  |  |    |
| ScCrz1 | LSVASMNSNYLLPVNSHGYKHISNLDELDDLSTLYSDNLLSASNNSDFNNSNNGIINT    |  |    |
|        |                                                               |  |    |
| CtCrz1 | ISSTNLPAMEN-----AKQDGFNSNFMENKPYNQES-----FTVPQFKTEPE-         |  |    |
| CaCrz1 | VSSTNLPMEEDSIKWGGNGQEAYTSLAMMEQRASADNSGMRLATHQFSETQIKQEDQQ    |  |    |
| ScCrz1 | ADTQNSTAIN-----KSKVGTNQKMLLTIPTSSTPSP---STHAAPVTPIISIQEF      |  |    |
|        |                                                               |  |    |
| CtCrz1 | ---GDQYIFSNPQMNFDFDITVTPPPQ-SESKQFPP-----QGSQFDIMS            |  |    |
| CaCrz1 | TNMNHQYTFSNPQMNFDFDITVTPPPQLEVKPFGNDKDMNNSSGTTNNNNNSQFDIVS    |  |    |
| ScCrz1 | N-EGHFPVKNEDDGTLLQKVRDNESYSATNNNNLLR-----P-----DDNDYNNEA      |  |    |
|        |                                                               |  |    |
| CtCrz1 | TAATNNSNQLLTENNLTYNQLO-SRKGTDEN-LEVERDATGIIISINQAPEVIAAKTPS   |  |    |
| CaCrz1 | TAATNNSNQLLTENNLSNYNQLO RTEQGNDNSLQIHRDATGIIISINQAPEEIAAKTPS  |  |    |
| ScCrz1 | LSDIDRSFEDIINGRKLKLLKSSRRSSQTSNNSFTSRSSRSRSISPDEKAKSISANREK   |  |    |
|        |                                                               |  |    |
| CtCrz1 | LFSNSSANS SMHNS---PRSDVESNTNNGNNSNGLIPNSQLLSPSANS-----G       |  |    |
| CaCrz1 | LFSNSSANS SIHNS---PRSDIDNKSGQYNNGGDGNLVPNSQLLSPSPNSNNDNYGGG   |  |    |
| ScCrz1 | LLEMADLLPSENDNRRERYDNSKTSYNTINSSNFEDNNSNLLTSKPKIES-----G      |  |    |
|        |                                                               |  |    |
| CtCrz1 | GDNKDS---LSPEEFQSMKRGRRKSHASKS--NP-SVSPRSKS-----PN            |  |    |
| CaCrz1 | GSSNDENLLNPEEFQSVKRGRRKSHASRTSTNPNSLSPRSRSRSRSASAKSSNDAVISDN  |  |    |
| ScCrz1 | IVNIKN-----ELDDTSKDLGILLDIDSLGQFEQKVGFKND-----DN              |  |    |
|        |                                                               |  |    |
| CtCrz1 | DESEEKLSREKMLELALPTSSSKRTQKHPSLYGLCHLCKRFRTRPYNLKSHIRTHTQEKP  |  |    |
| CaCrz1 | DESDVQLSREKMLELALPSSSSKRTQKHPSLYACHLCKRFRTRPYNLKSHIRTHTQEKP   |  |    |
| ScCrz1 | HENNDNGTF SVKKNDNLEKLD SVTNNRKNPANFACDVCGKFRTRPYNLKSHLRTHNERP |  |    |
|        |                                                               |  |    |
| CtCrz1 | FICSRGKSFARSHDKRHELLHQGVKNFKCEGFLQDGTKWGCGKSFARADALRRHFQTE    |  |    |
| CaCrz1 | FICSKCGKSFARSHDKRHELLHQGIKNFKCEGYLQDGTWRWGCGKSFARADALRRHFQTE  |  |    |
| ScCrz1 | FICSI CGKAFARQHDKRKHEDLHTGKKRYVCGGKLDGKPGWCGGKSFARSDALGRHFQTE |  |    |
|        |                                                               |  |    |
| CtCrz1 | AGKQCVKRI LLEEENSNNILKEATNGGDVDRGGGNDGDDDDNNDQLLTSSSSKSTYS    |  |    |
| CaCrz1 | AGKQCVKRI LLEEQAN-----SSGKPLATSSGVEIT--                       |  |    |
| ScCrz1 | SGRRICITPLYEEARQE-----KS--GQES--                              |  |    |

Calcofluor white

Brightfield

Figure S3

*Candida tropicalis*

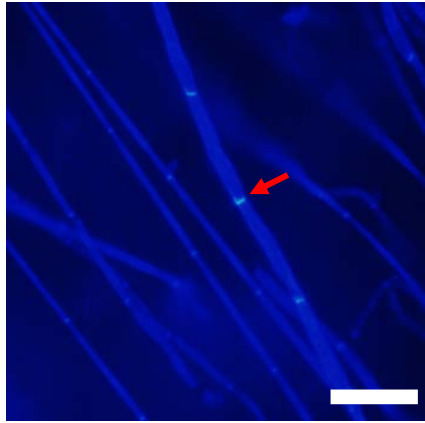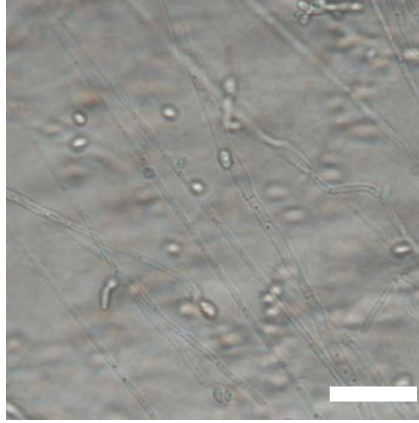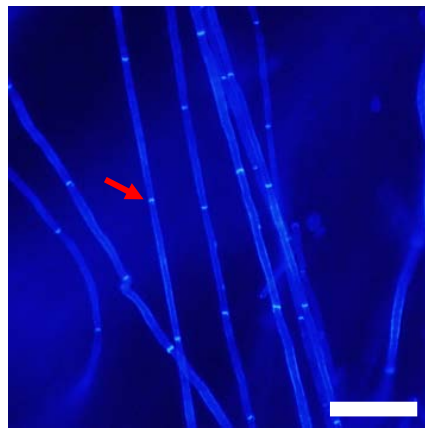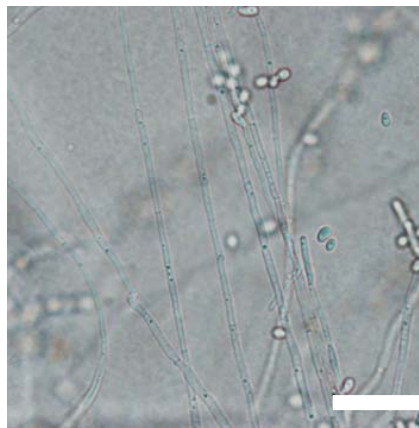

*Candida albicans*

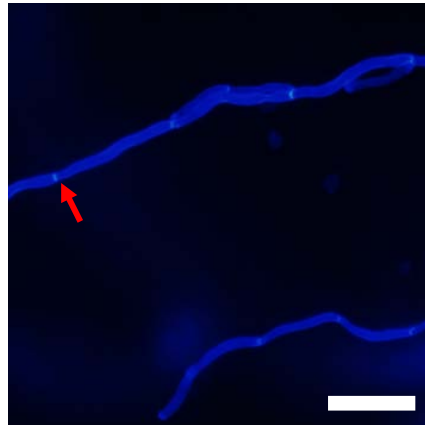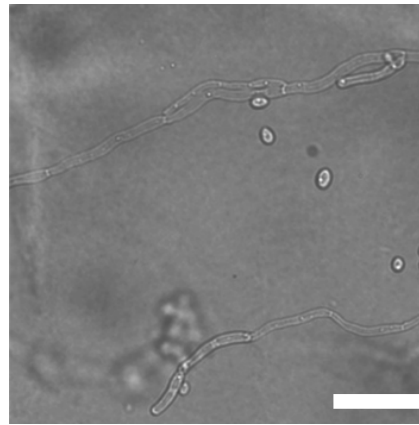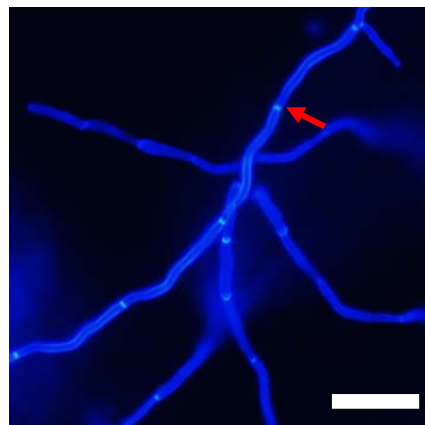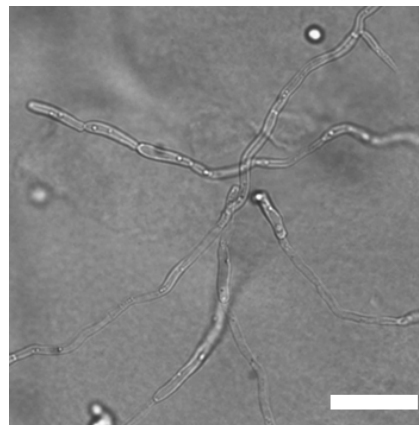

# Figure S4

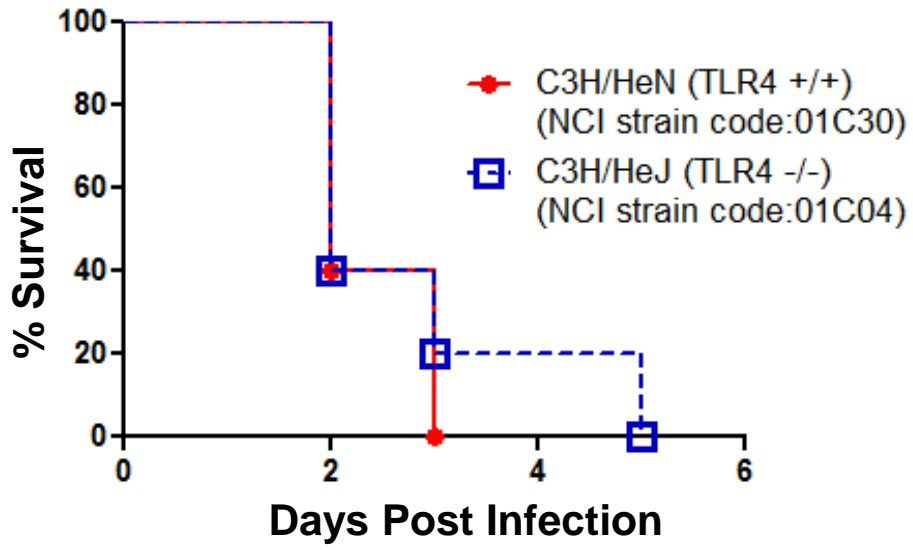

# Figure S5

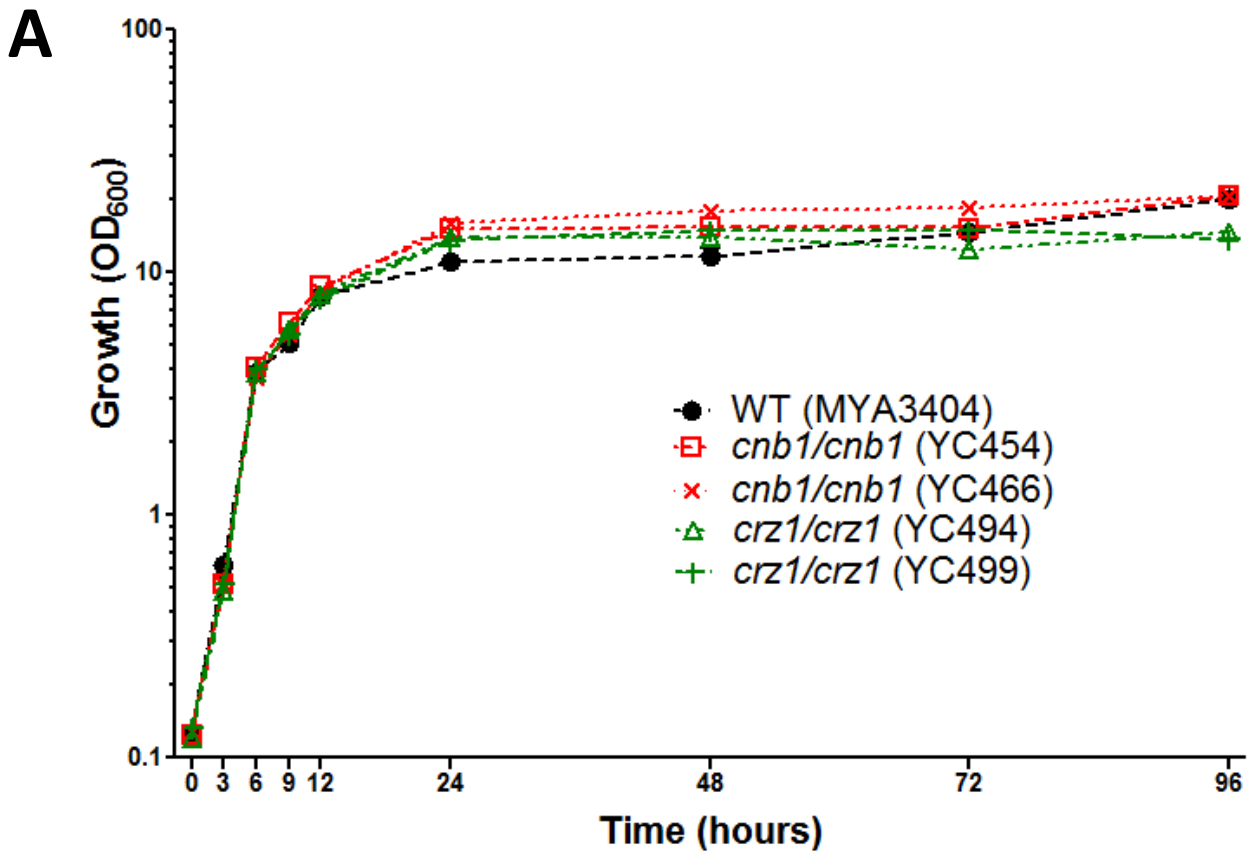

**B**

| Strains                    | Doubling time (hr; in 6 hrs) |
|----------------------------|------------------------------|
| ● WT (MYA3404)             | 1.20 ± 0.02                  |
| ■ <i>cnb1/cnb1</i> (YC454) | 1.18 ± 0.02                  |
| × <i>cnb1/cnb1</i> (YC466) | 1.23 ± 0.02                  |
| △ <i>crz1/crz1</i> (YC494) | 1.19 ± 0.03                  |
| + <i>crz1/crz1</i> (YC499) | 1.21 ± 0.03                  |
